# Supplementary material for: Biocatalysis of ursolic acid by the fungus Gliocladium roseum CGMCC 3.3657 and resulting anti-HCV activity
Source: PubMed Central journal article supplement (PMC9080225; doi:10.1039/c8ra01217b), 2018-05-03
Supplement: RA-008-C8RA01217B-s001.pdf [file RA-008-C8RA01217B-s001.pdf]

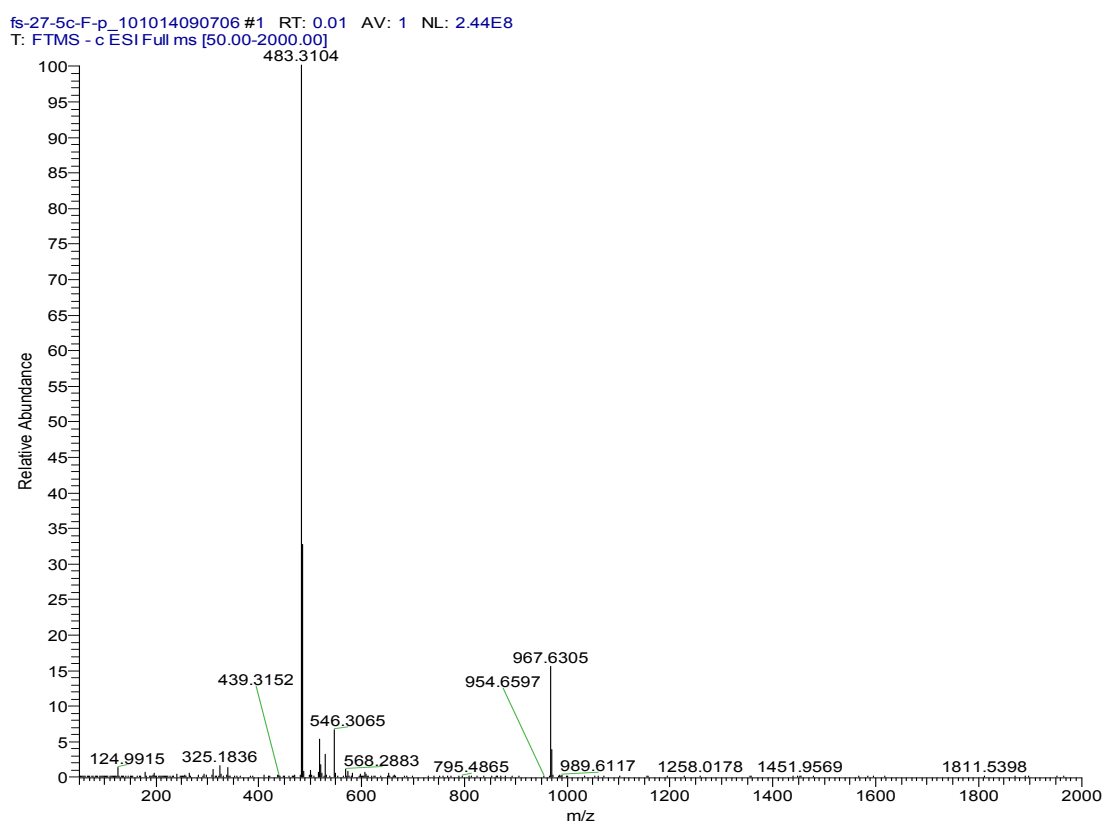

Appendix 2-1. Mass spectrum of compound 2.

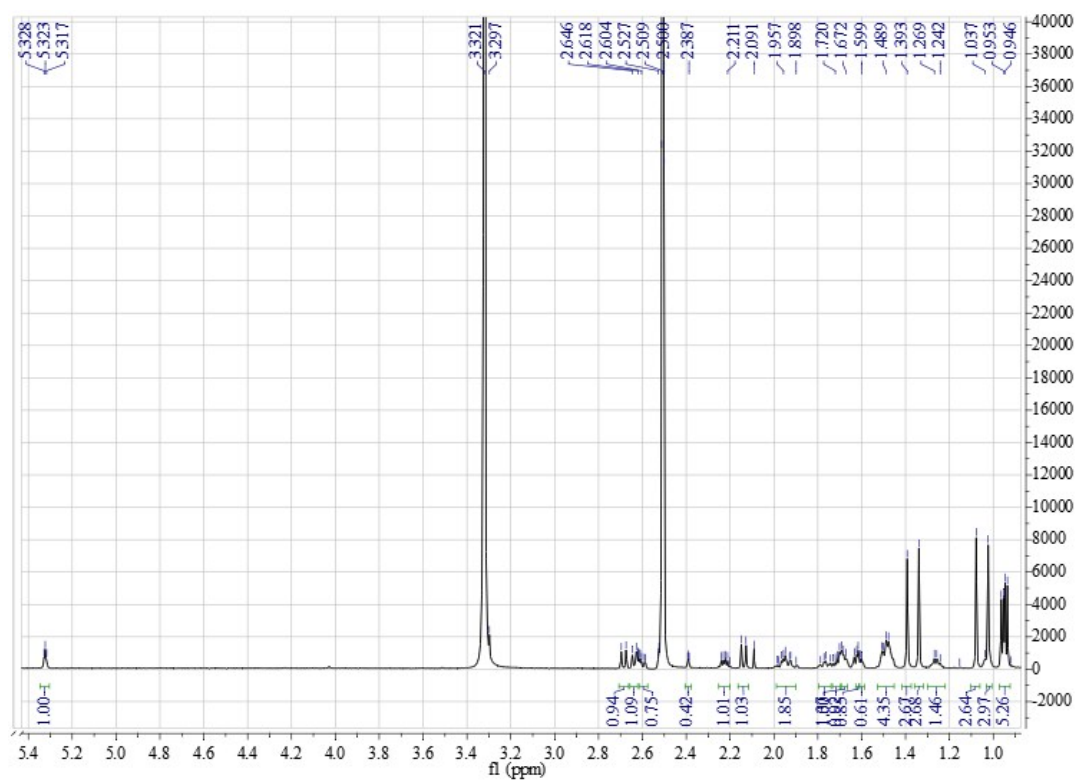

Appendix 2-2. <sup>1</sup>H-NMR spectrum of compound 2.

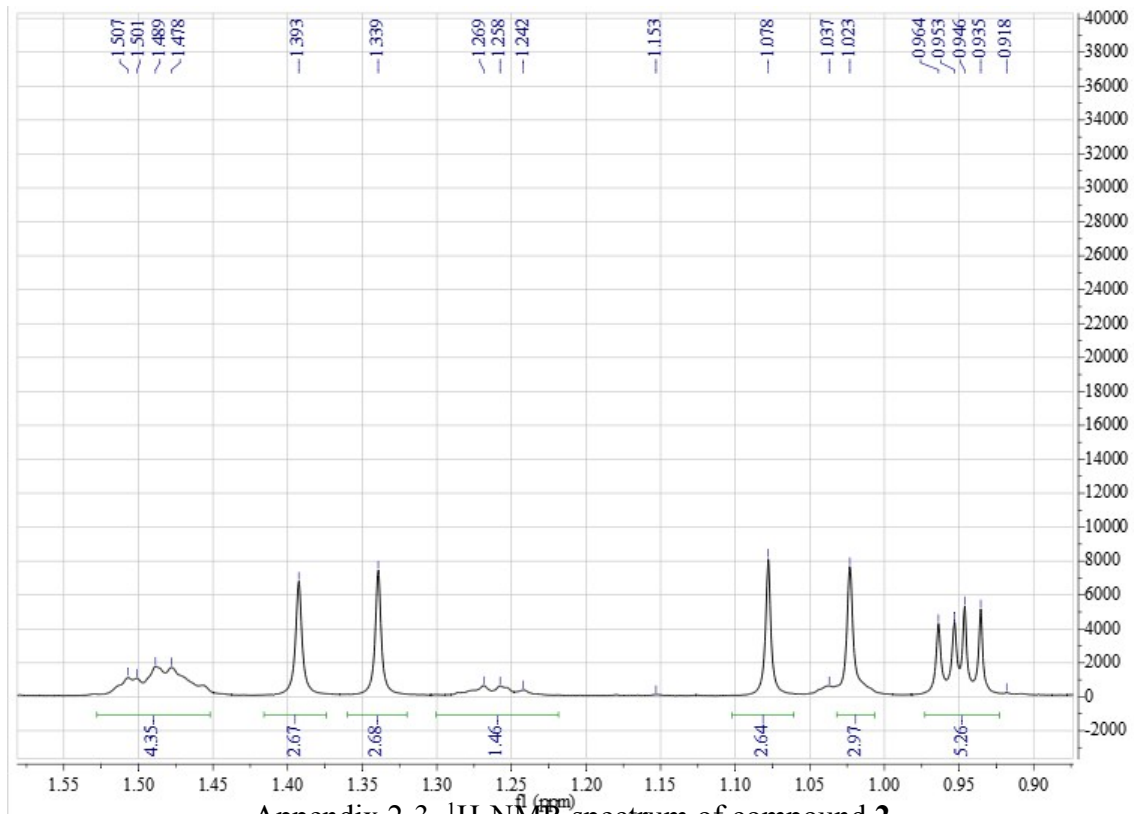

Appendix 2-3.  $^1\text{H}$ -NMR spectrum of compound **2**.

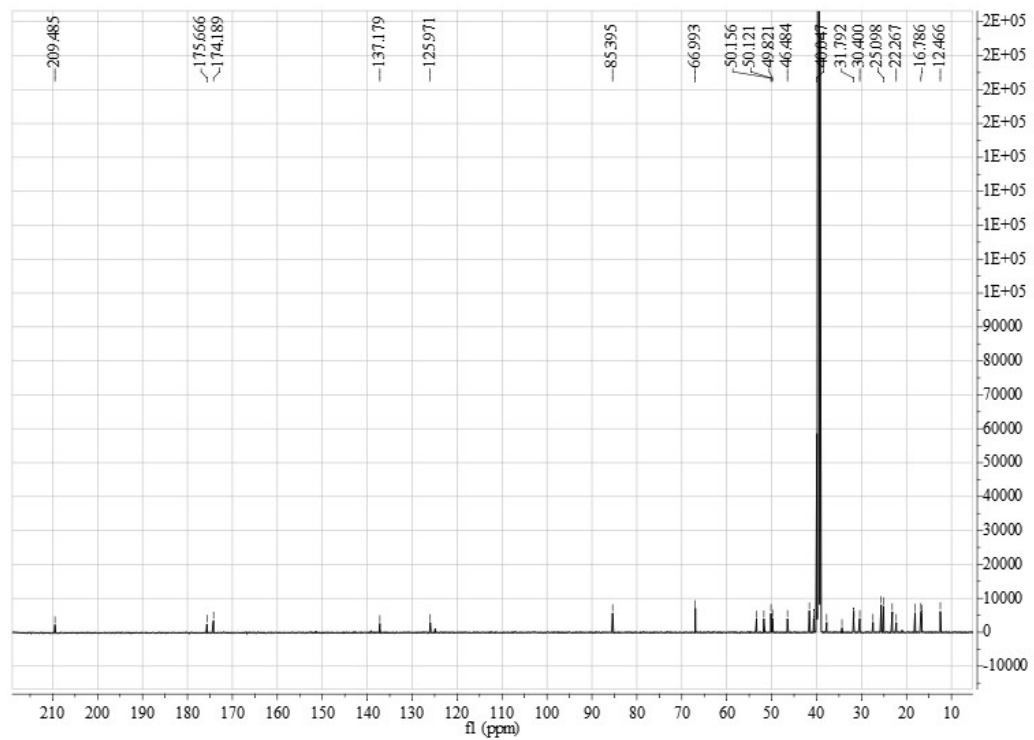

Appendix 2-4.  $^{13}\text{C}$ -NMR spectrum of compound **2**.

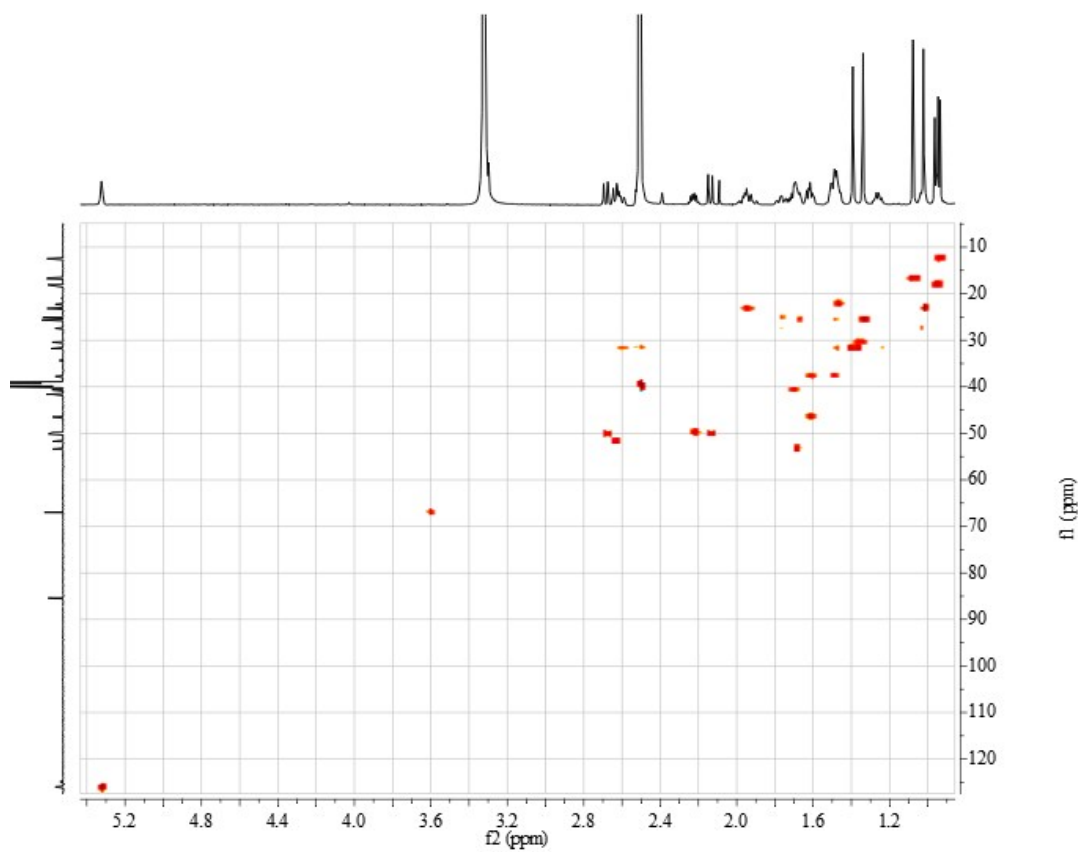

Appendix 2-5. HMBC spectrum of compound **2**.

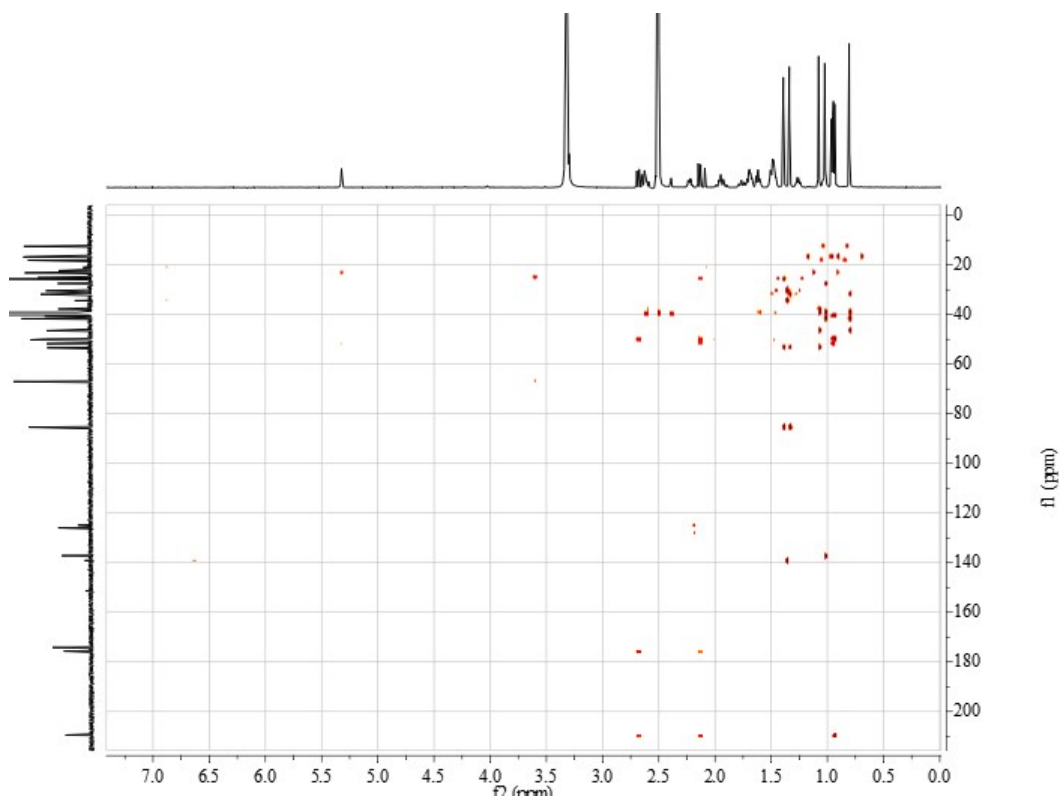

Appendix 2-6. HMBC spectrum of compound **2**.

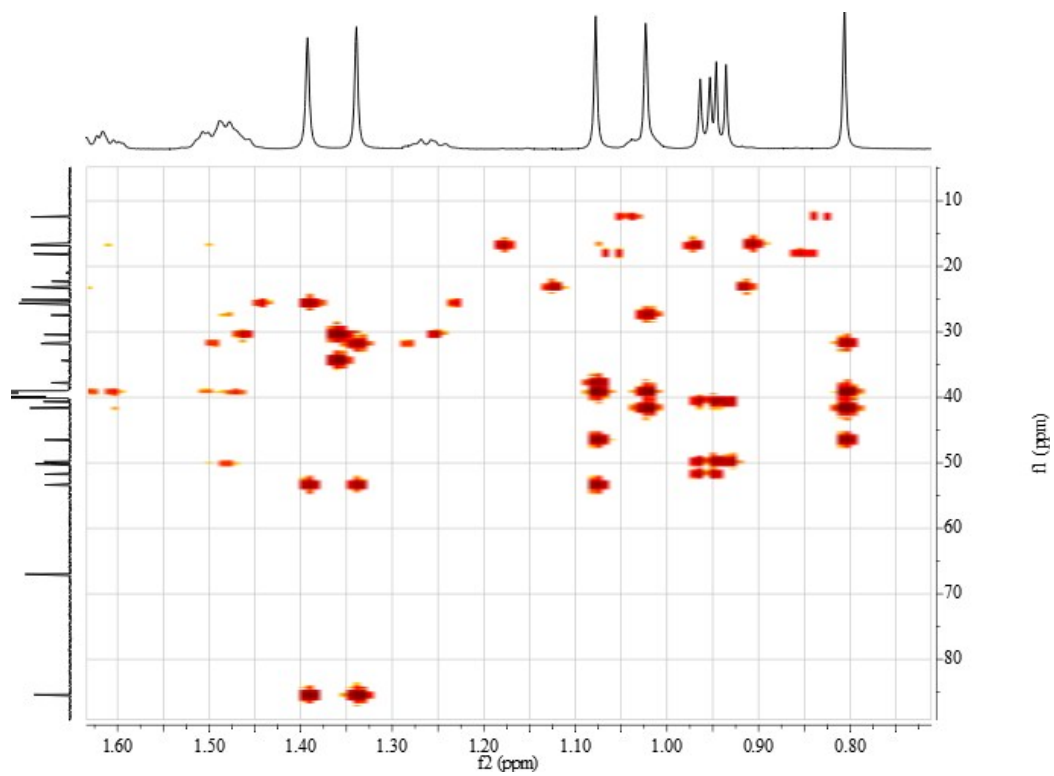

Appendix 2-7. HMBC spectrum of compound 2.

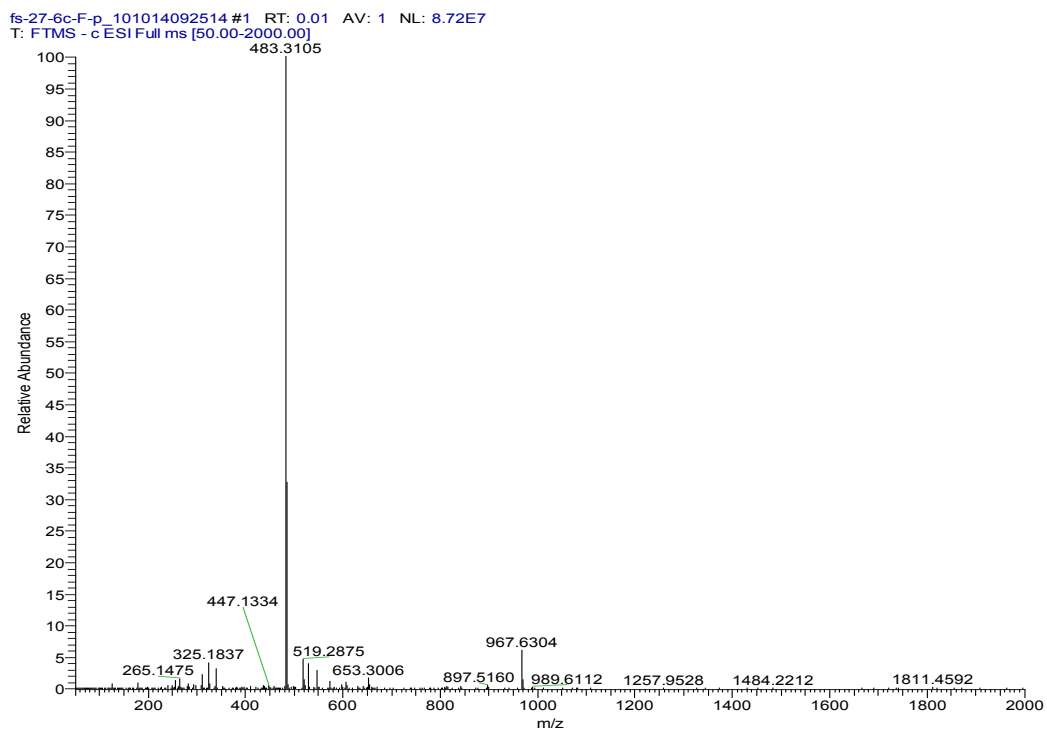

Appendix 3-1. Mass spectrum of compound 3.

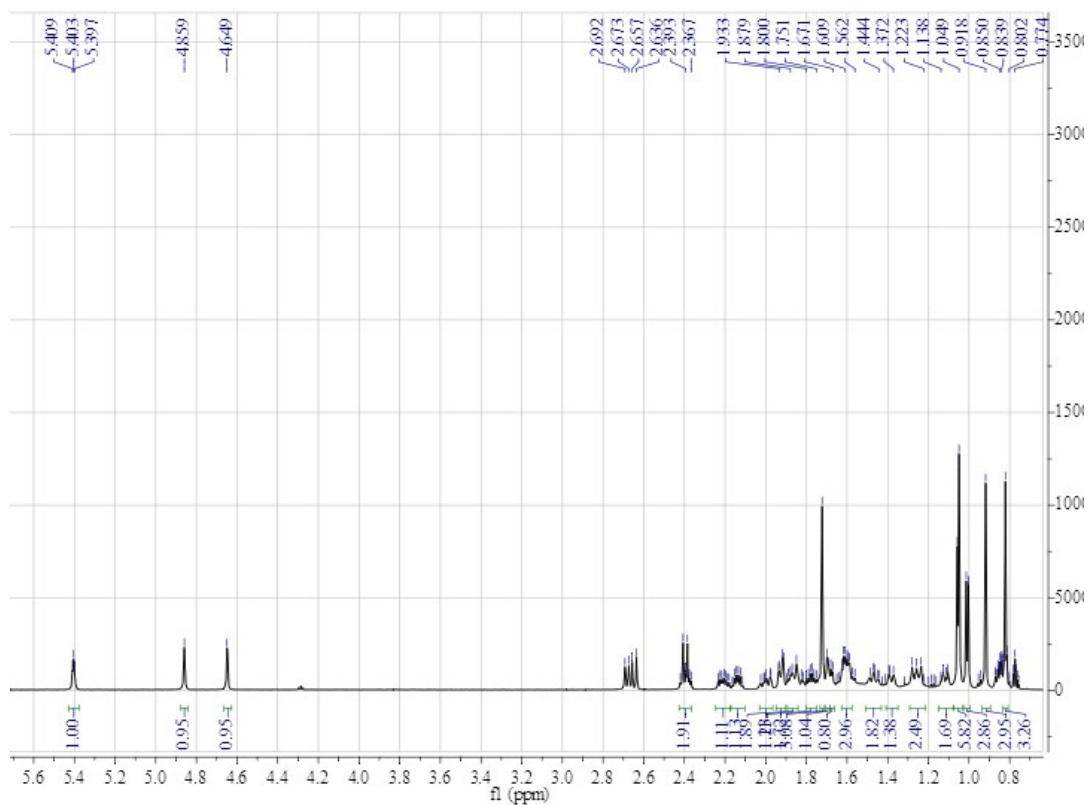

Appendix 3-2. <sup>1</sup>H-NMR spectrum of compound 3.

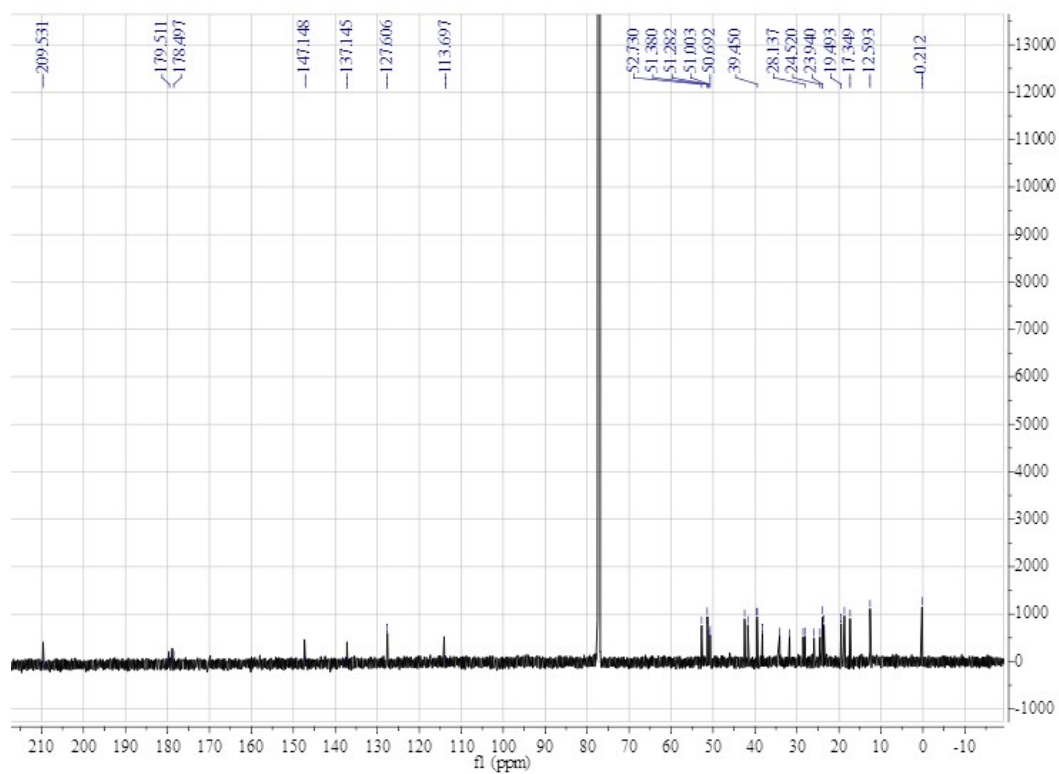

Appendix 3-3. <sup>13</sup>C-NMR spectrum of compound 3.

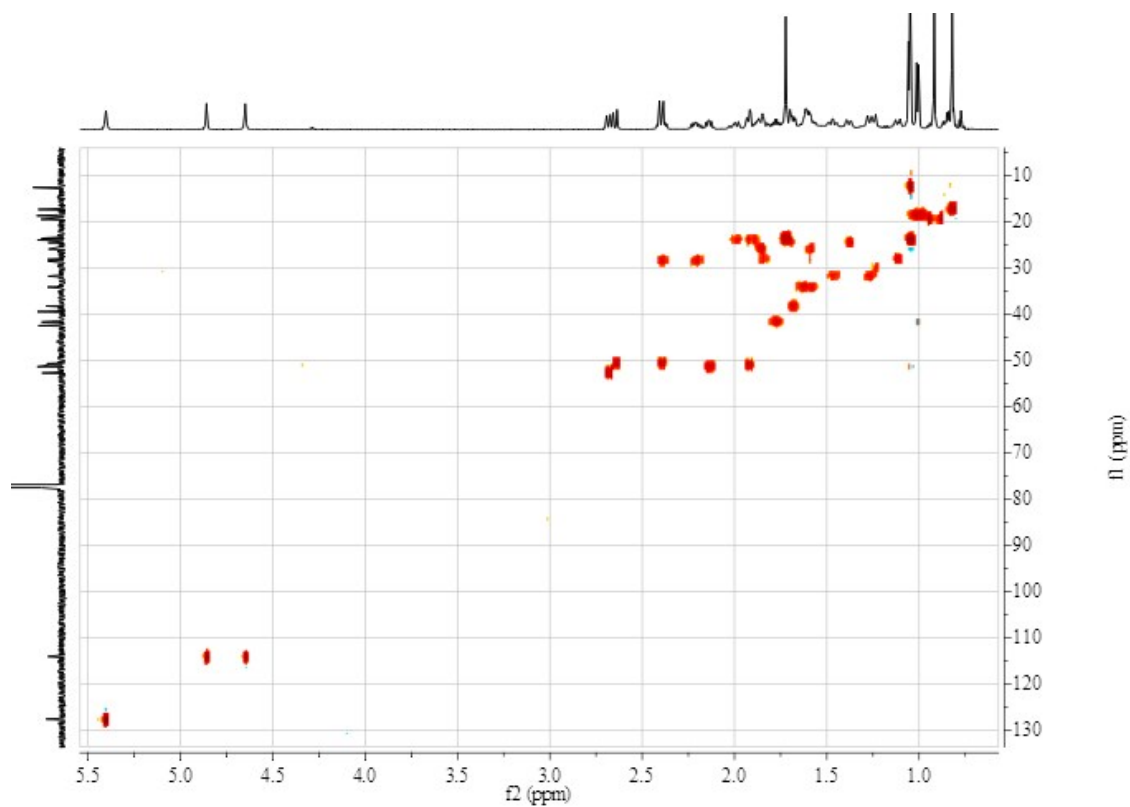

Appendix 3-4. HMQC spectrum of compound 3.

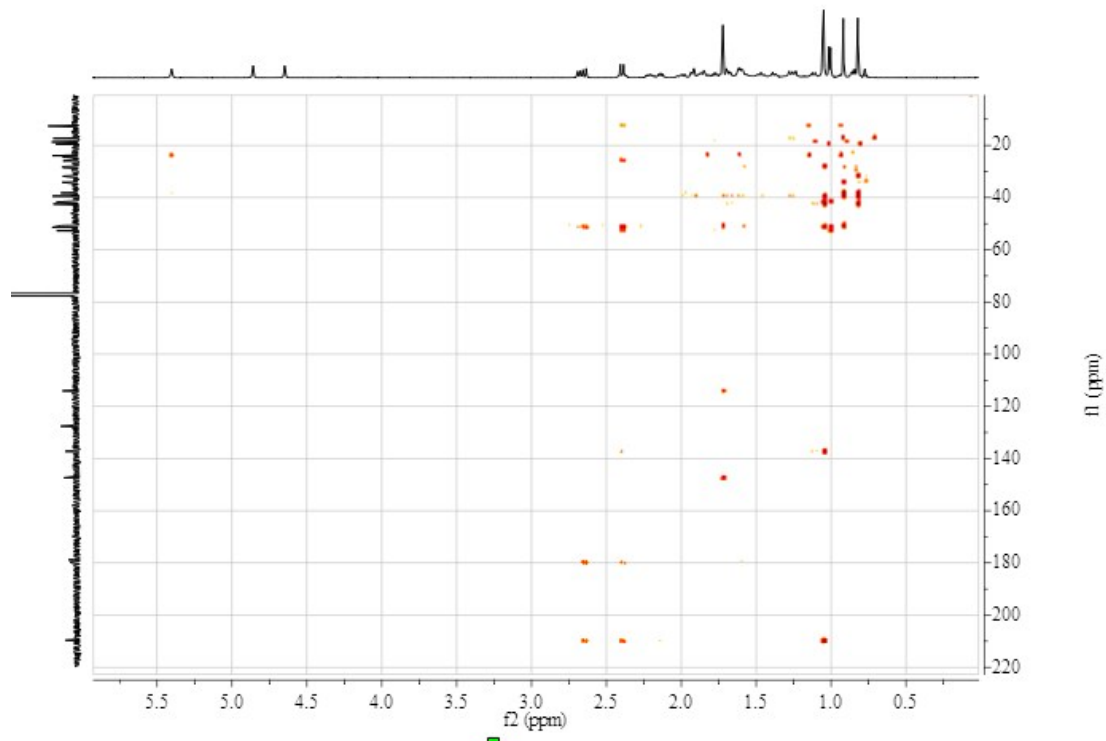

Appendix 3-5. HMBC spectrum of compound 3.

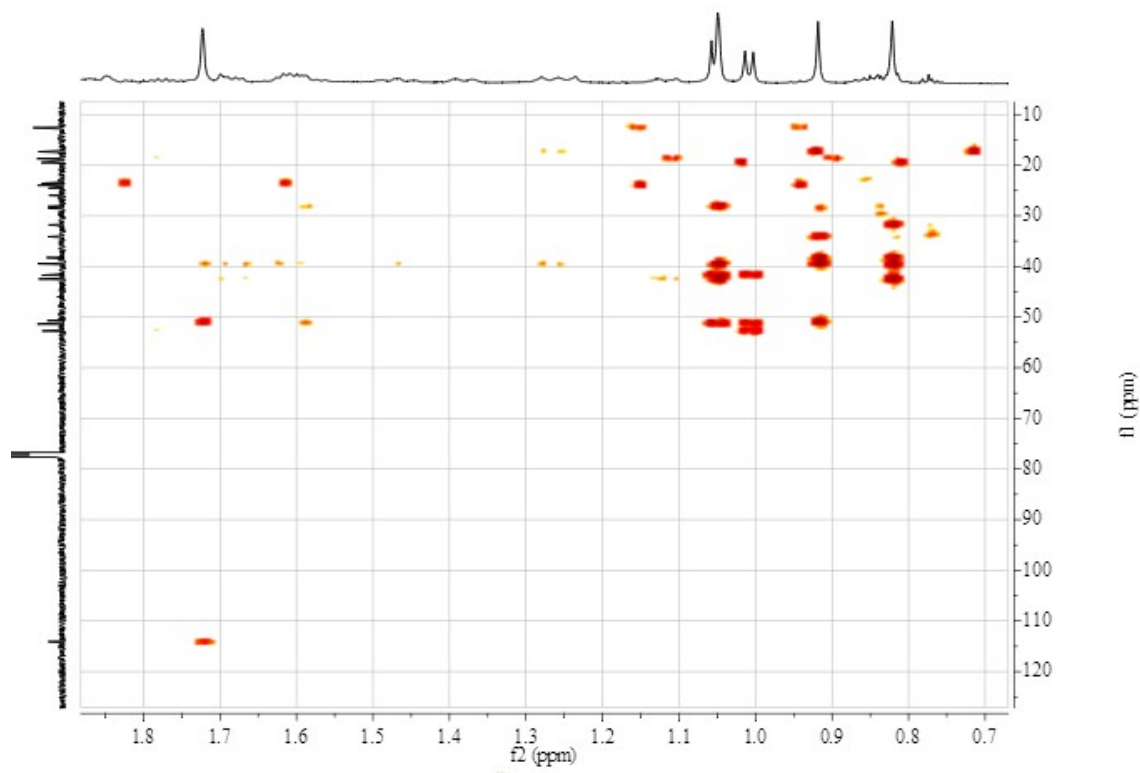

Appendix 3-6. HMBC spectrum of compound 3.

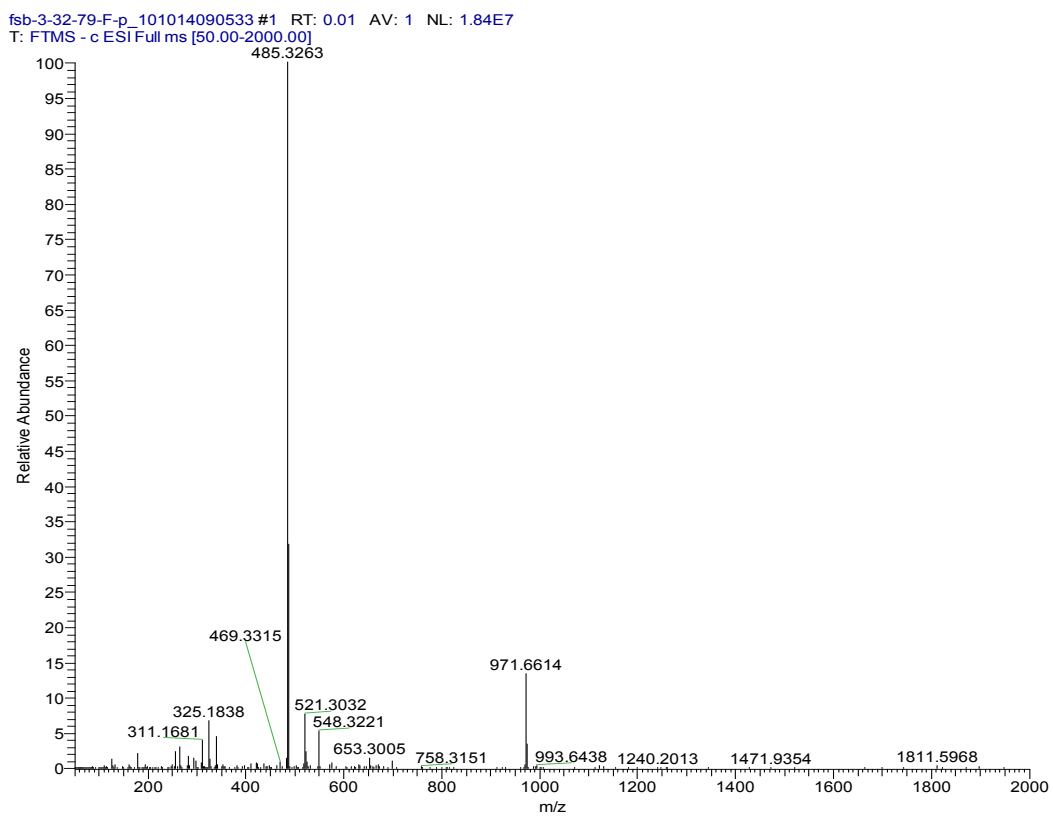

Appendix 4-1. Mass spectrum of compound 4.

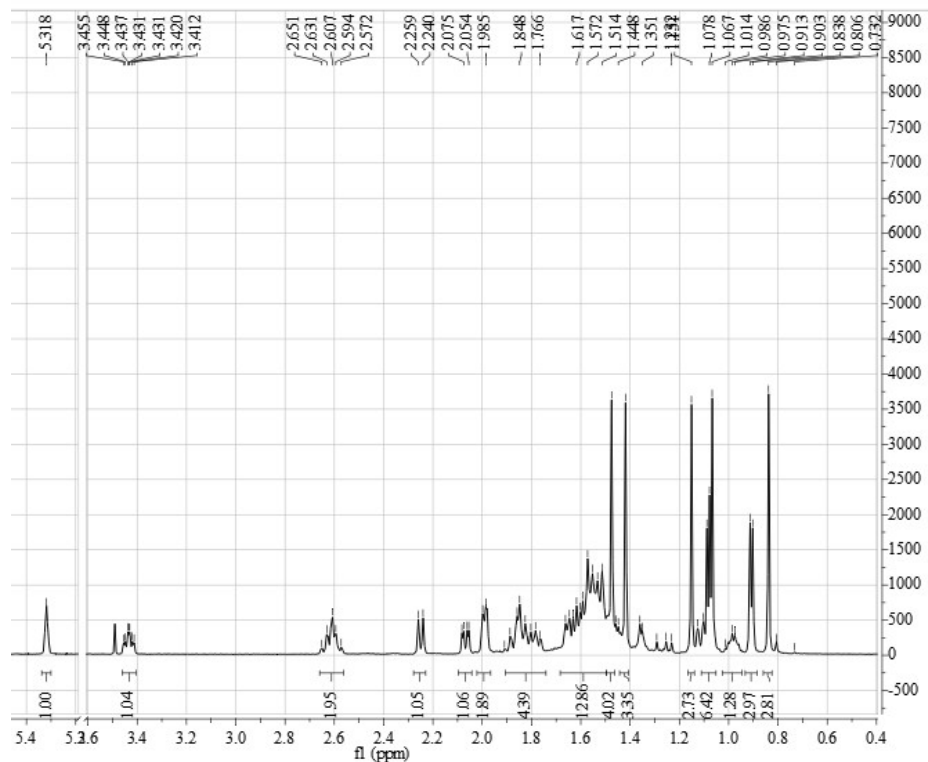

Appendix 4-2. <sup>1</sup>H-NMR spectrum of compound 4.

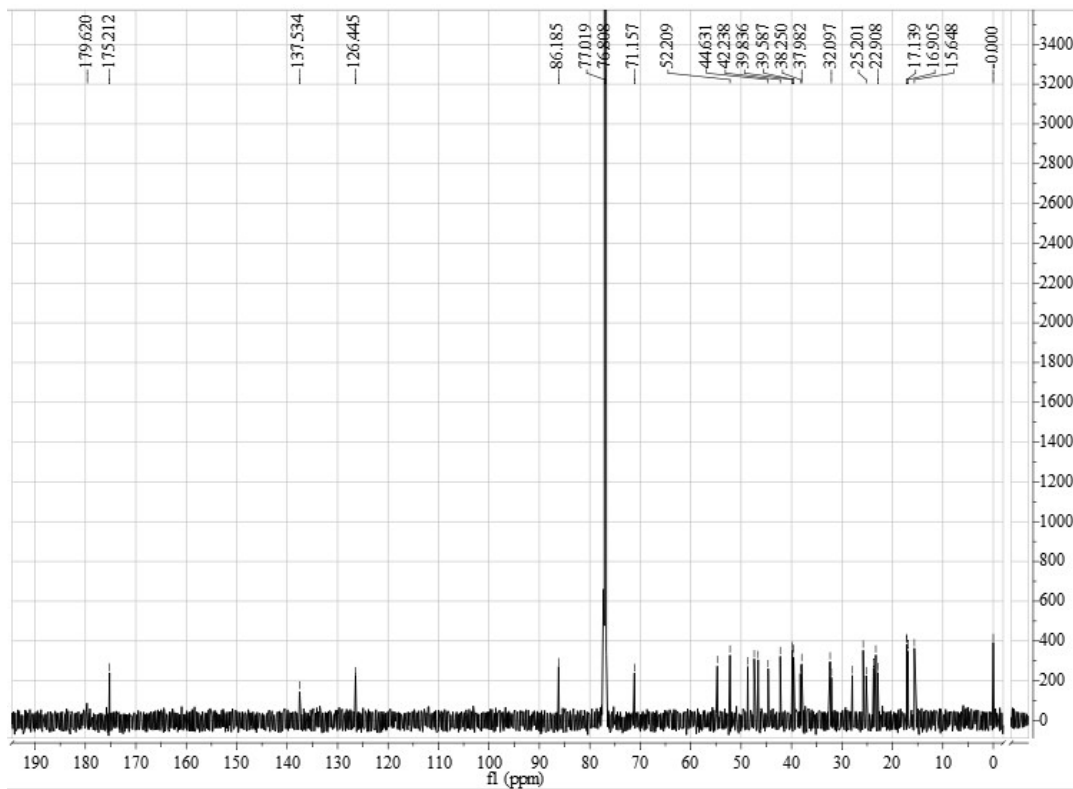

Appendix 4-3. <sup>13</sup>C-NMR spectrum of compound 4.



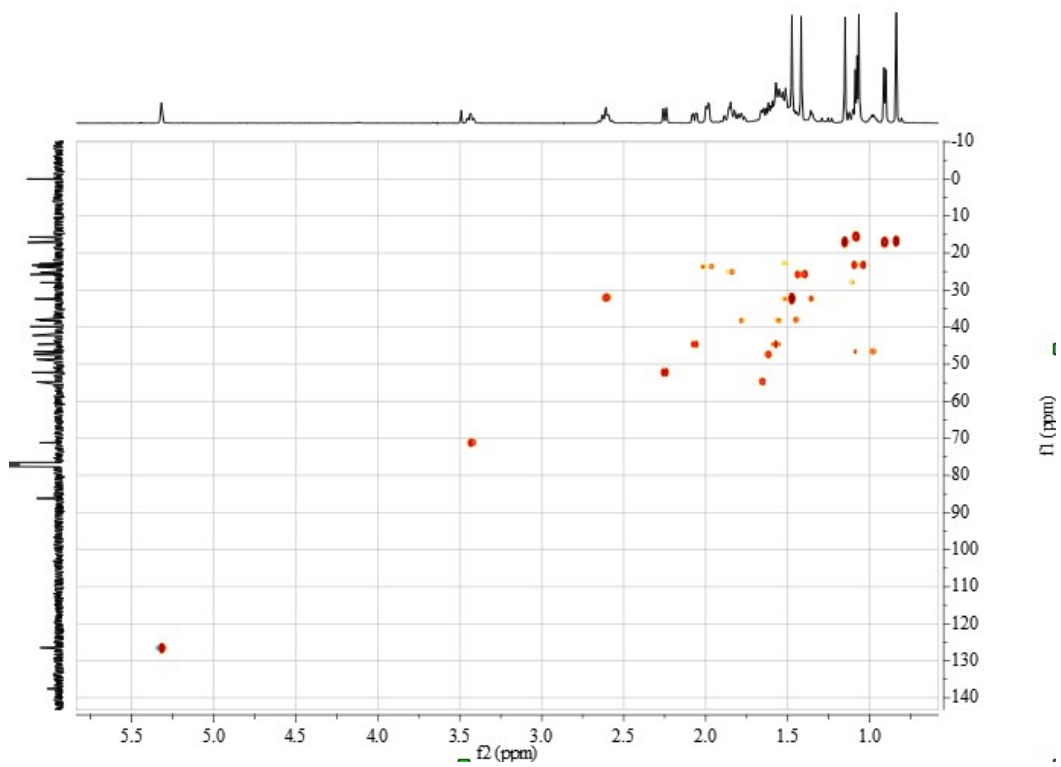

Appendix 4-4. HMBC spectrum of compound 4.

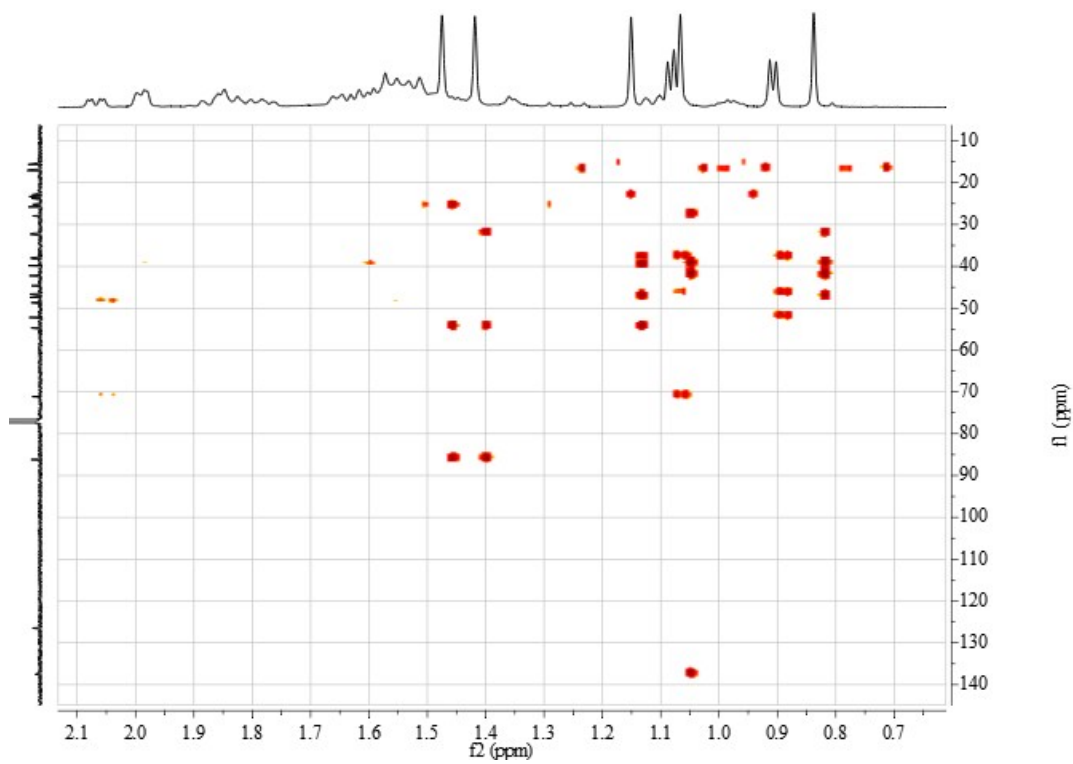

Appendix 4-5. HMBC spectrum of compound 4.

fsb-3-37FT\_100702094549 #1 RT: 0.00 AV: 1 NL: 7.78E7  
T: FTMS - p ESI Full ms [50.00-1500.00]

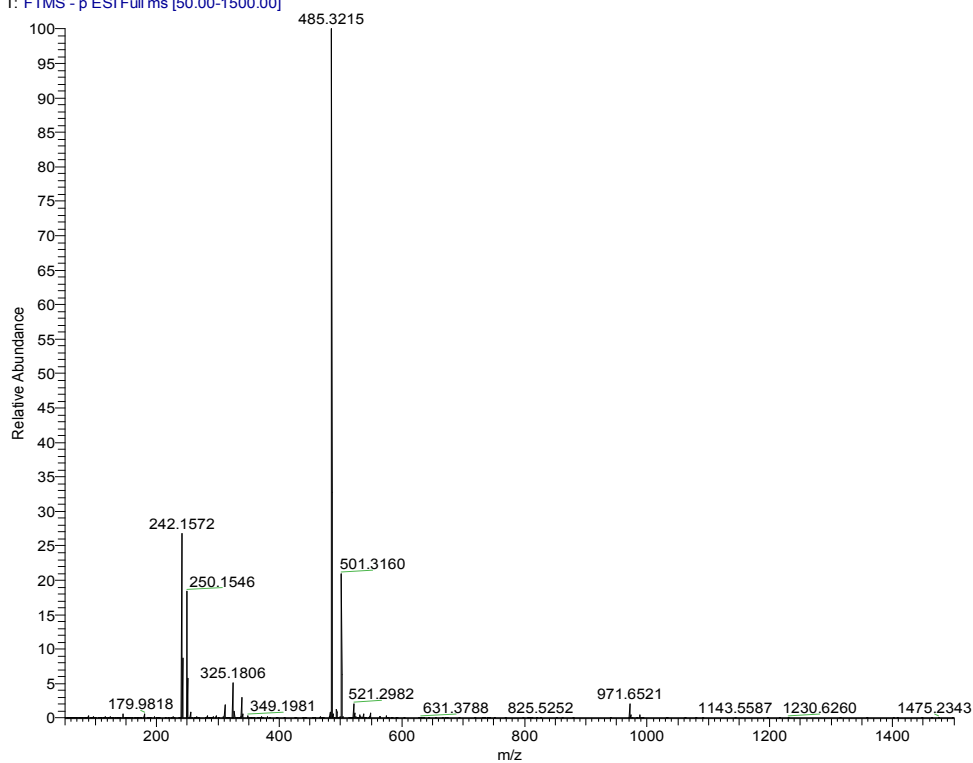

Appendix 5-1. Mass spectrum of compound 5.

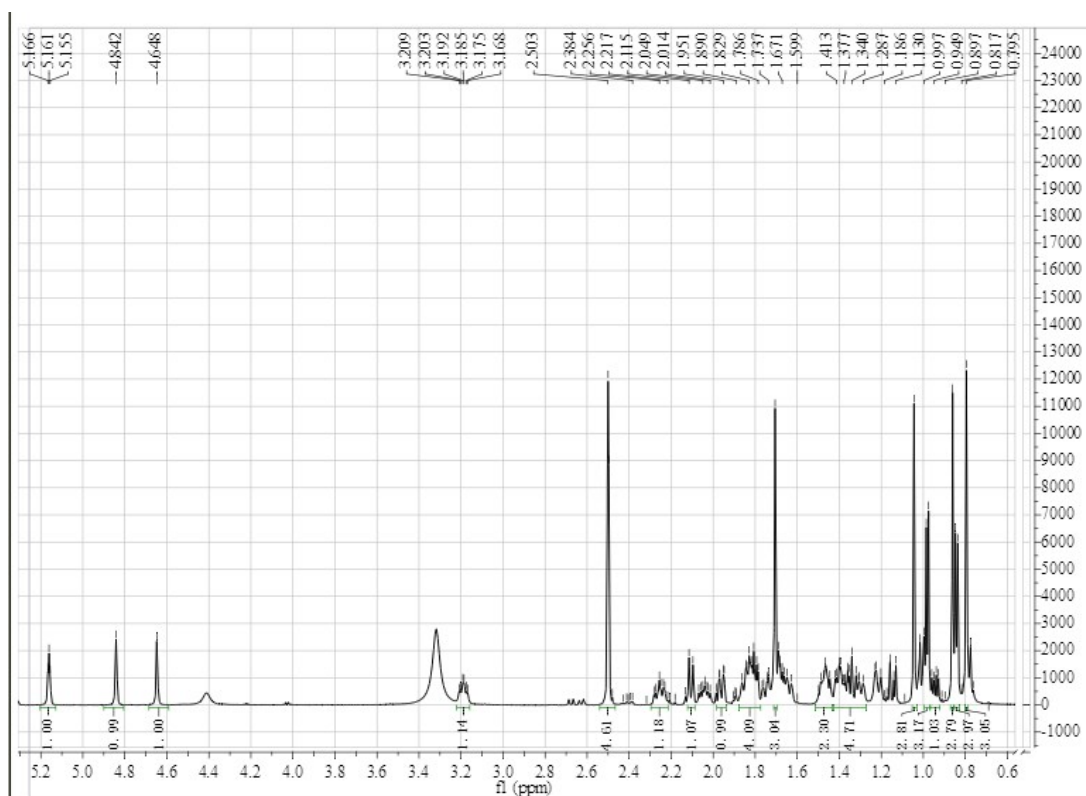

Appendix 5-2.  $^1\text{H}$ -NMR spectrum of compound **5**.

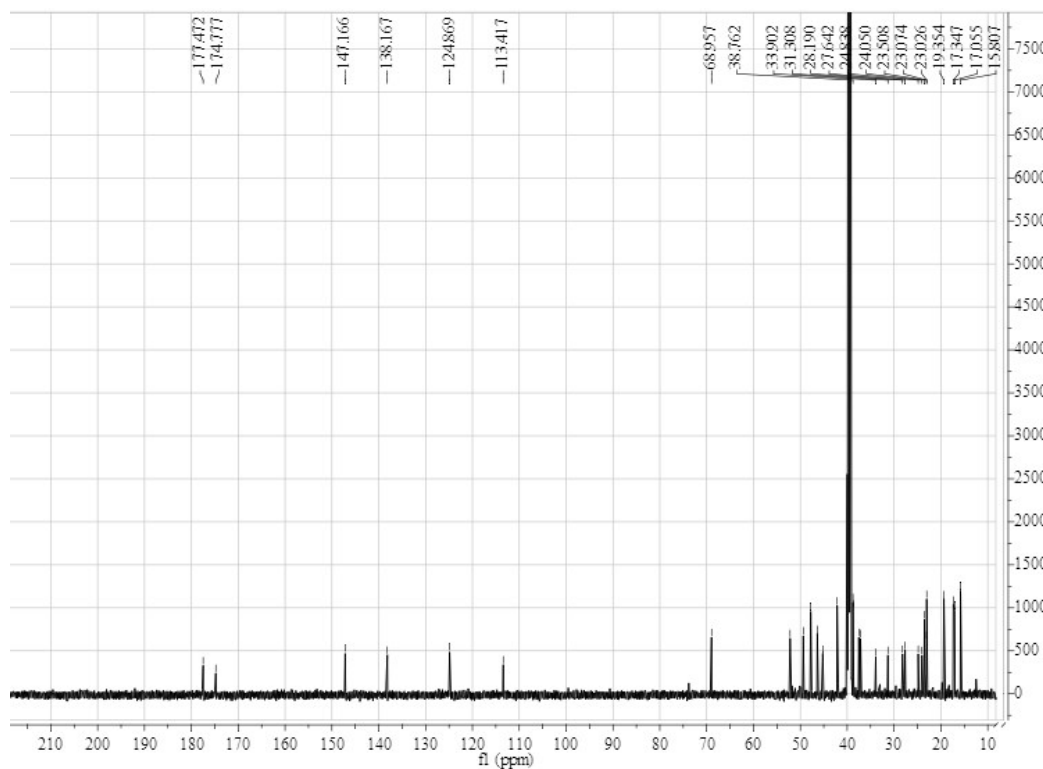

Appendix 5-3.  $^{13}\text{C}$ -NMR spectrum of compound **5**.

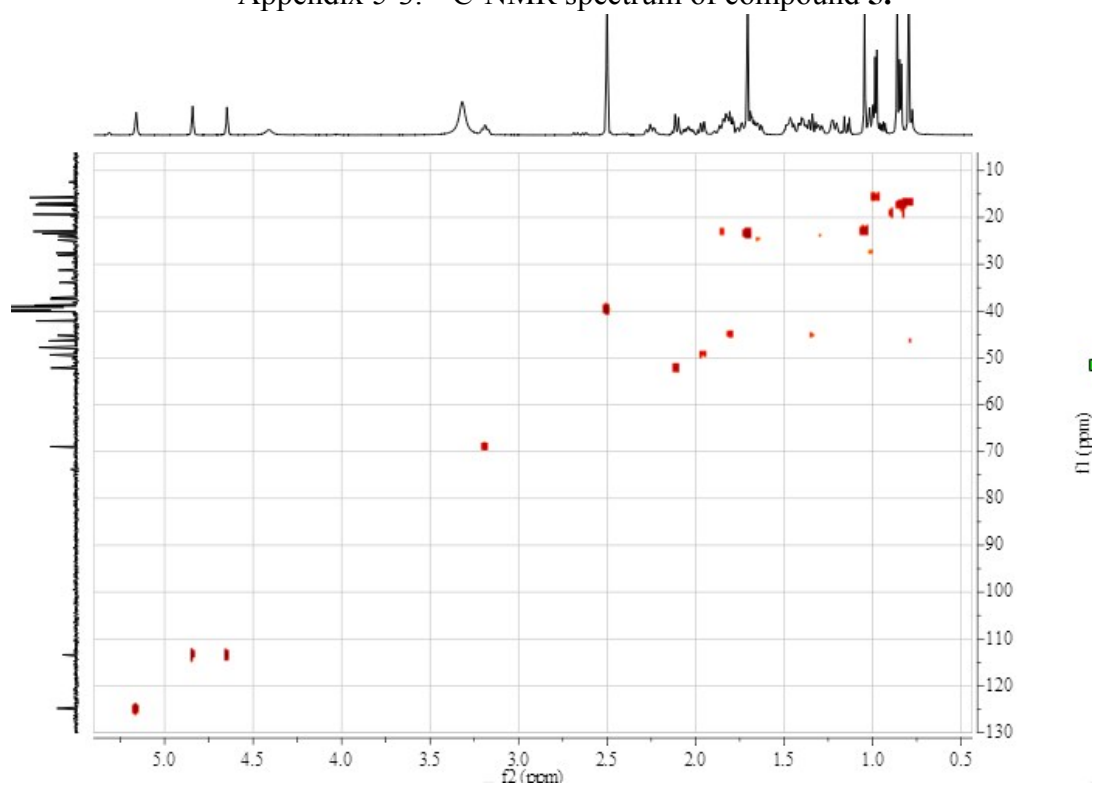

Appendix 5-4. HMQC spectrum of compound **5**.

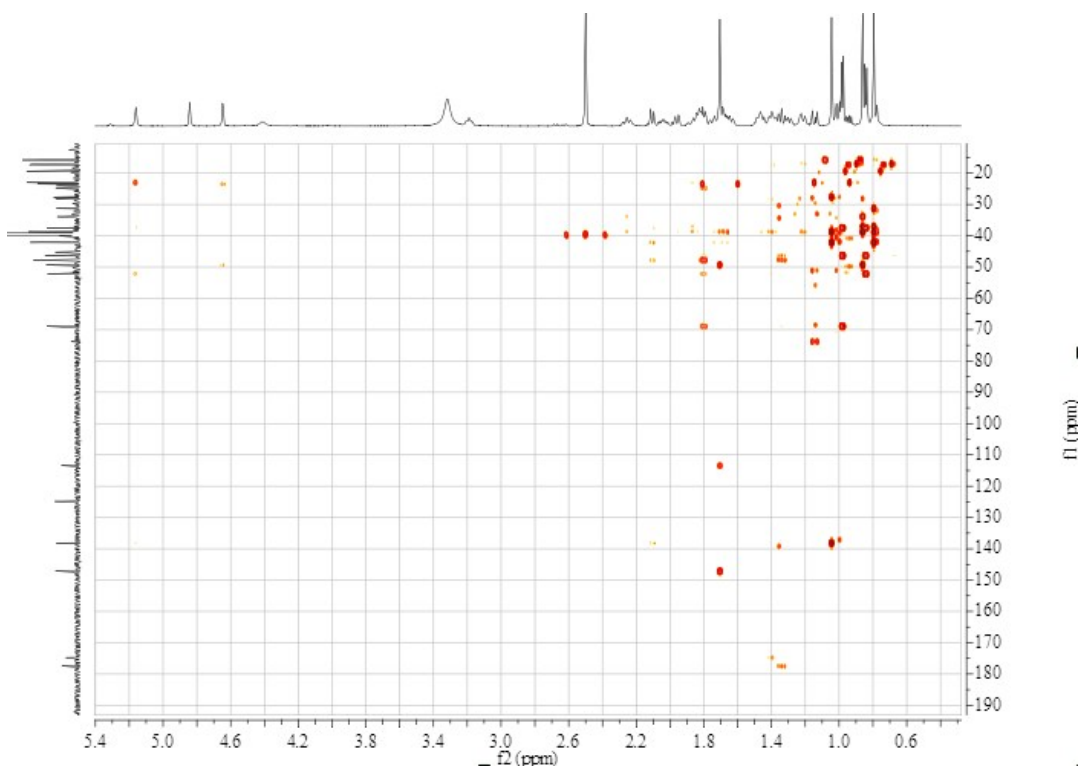

Appendix 5-5. HMBC spectrum of compound **5**.

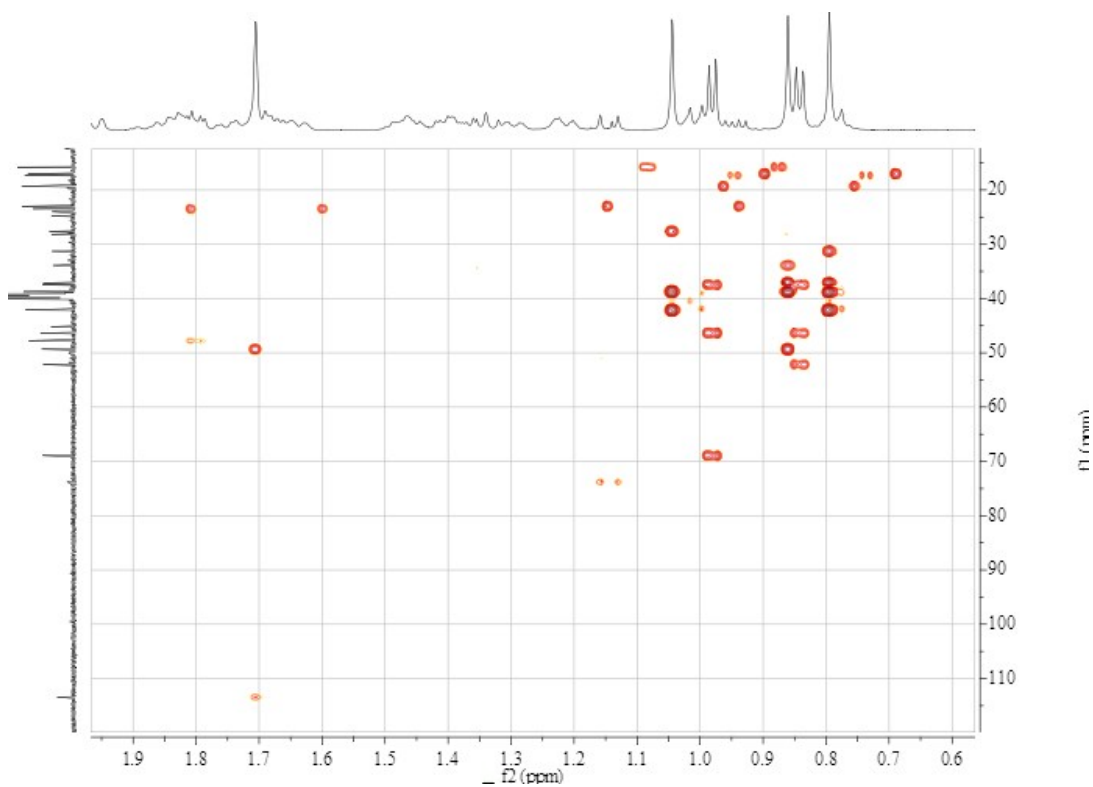

Appendix 5-6. HMBC spectrum of compound **5**.
